# Supplementary figures and images for: Association of Prior COVID-19 Infection With Newly Diagnosed Erectile Dysfunction: Evaluation of 42,406 COVID-19 Recovered Men
Source: Research Square preprint supplement (doi:10.21203/rs.3.rs-1983826/v1), 2022-09-16

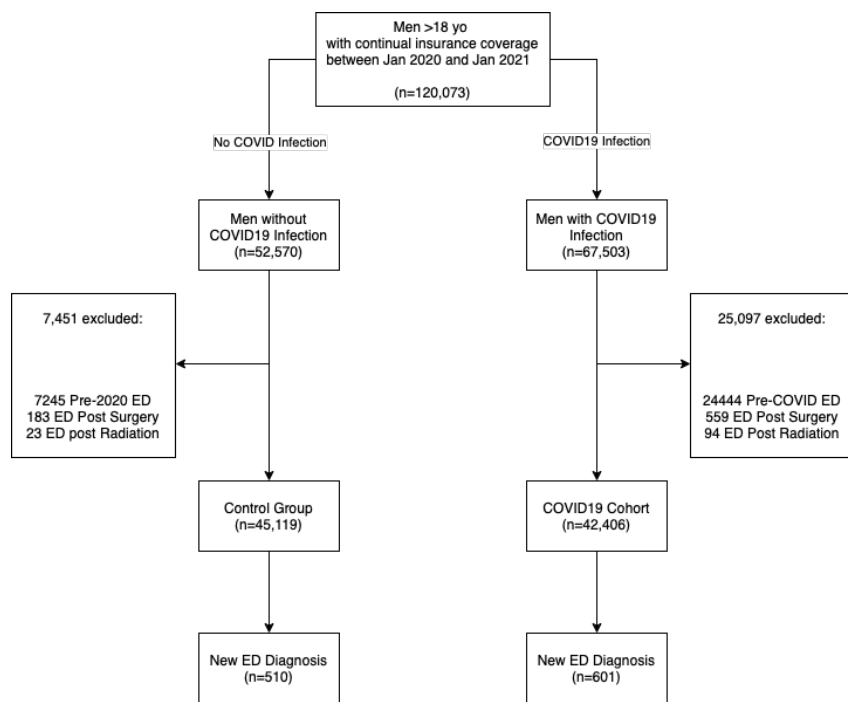

Supplement: Supplementary file 1 [file 932a4a9d48d97a8744ca2e12.pdf]
